# Supplementary material for: A novel green approach based on ZnO nanoparticles and polysaccharides for photocatalytic performance
Source: Royal Society of Chemistry journal article supplement (doi:10.1039/d0dt01128b), 2020-01-01
Supplement: d0dt01128b1.pdf [file d0dt01128b1.pdf]

Suplemmentary material

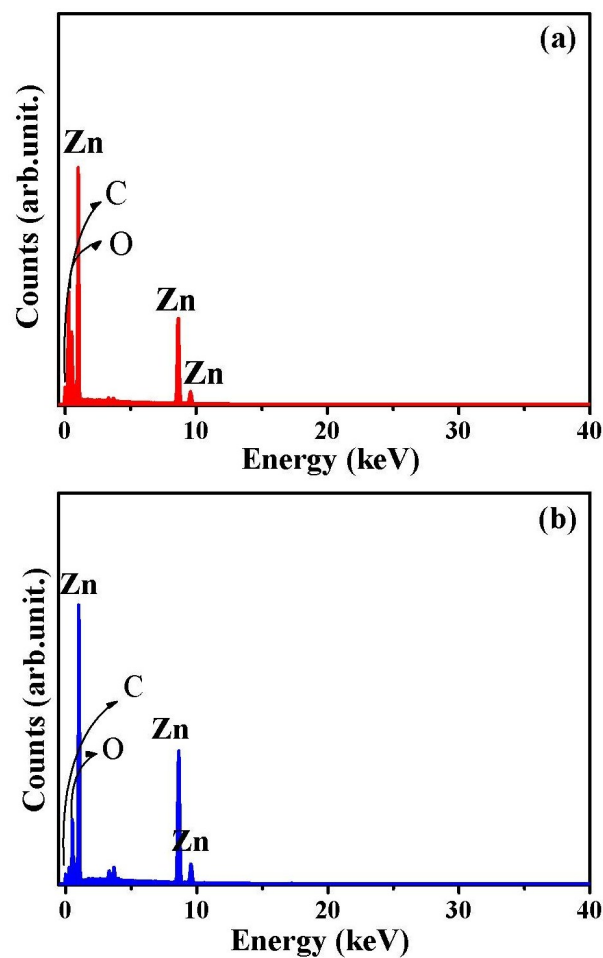

**Figure S1.** Semi-quantitative analyses performed by EDS demonstrating spectrum of (a) AGZ and (b) KGZ .

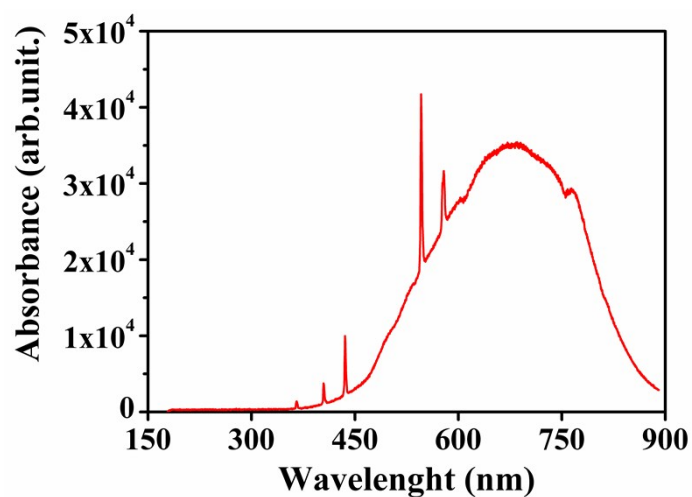

**Figure S2.** Emission spectrum of the lamp used as visible light.
